# Supplementary material for: Rearrangements of 2.5 Kilobases of Noncoding DNA from the Drosophila even-skipped Locus Define Predictive Rules of Genomic cis-Regulatory Logic
Source: PubMed Central journal article supplement (PMC3585115; doi:10.1371/journal.pgen.1003243), 2013-02-28
Supplement: pgen.1003243.s008.pdf [file pgen.1003243.s008.pdf]

Table S1. Parameters of 5 Models

| Parameter                              | Run number |        |        |        |       | Parameter                   | Run number |      |      |      |       |
|----------------------------------------|------------|--------|--------|--------|-------|-----------------------------|------------|------|------|------|-------|
|                                        | 1          | 2      | 6      | 7      | 4cs_7 |                             | 1          | 2    | 6    | 7    | 4cs_7 |
| RMS                                    | 2.27       | 2.33   | 2.40   | 5.29   | 1.48  | $A_{\text{Bcd}}^P$          | 1.36       | 0.69 | 0.03 | 0.08 | 3.99  |
| $S_{\text{M3}_2}^R \dagger$            | 1          | 1      | 1      | 1      | 1     | $A_{\text{Cad}}^P$          | 0.02       | 0.01 | 0.05 | 0.03 | 0.05  |
| $S_{\text{M32}}^R \dagger$             | 1          | 1      | 1      | 1      | 1     | $A_{\text{D-STAT}}^P$       | 3.98       | 3.98 | 1.09 | 3.99 | 3.98  |
| $S_{\text{M2}_3}^R \dagger$            | 1          | 1      | 1      | 1      | 1     | $A_{\text{Dichaete}}^P$     | 3.85       | 0.41 | 3.89 | 0.18 | 0.09  |
| $S_{\text{M23}}^R \dagger$             | 1          | 1      | 1      | 1      | 1     | $A_{\text{Hb}}^P$           | 0.82       | 2.73 | 2.72 | 0.04 | 0.09  |
| $S_{1.7\text{kb}}^R$                   | 0.3        | 0.3    | 0.2    | 1.41   | N/A   | $A_{\text{Kr}}^P$           | 0.07       | 0.13 | 0.03 | 2.95 | 0.1   |
| $S_{\text{MSE2}}^R$                    | 0.2        | 0.2    | 0.2    | 0.2    | N/A   | $A_{\text{Kni}}^P$          | 2.58       | 3.99 | 2.23 | 0.27 | 2.8   |
| $S_{\text{MSE3}}^R$                    | 0.8        | 0.8    | 0.8    | 0.8    | N/A   | $A_{\text{Gt}}^P$           | 3.99       | 2.07 | 2.53 | 0.04 | 0.02  |
| $R_{\text{max}} \dagger$               | 255        | 255    | 255    | 255    | 255   | $A_{\text{Tll}}^P$          | 2.88       | 3.96 | 0.02 | 1.95 | 0.004 |
| $\Theta$                               | 6.7        | 6.4    | 6.1    | 5.96   | 10.6  | $\lambda_{\text{Bcd}}$      | 1.53       | 1.99 | 4.99 | 2.16 | 1.68  |
| $E_{\text{B-H}}^C$                     | 0.34       | 0.44   | 0.21   | 0.35   | 0.35  | $\lambda_{\text{Cad}}$      | 4.98       | 4.98 | 4.97 | 3.18 | 4.99  |
| $E_{\text{C-H}}^C$                     | 0.66       | 0.99   | 0.33   | 0.88   | 0.88  | $\lambda_{\text{D-STAT}}$   | 1.62       | 1.98 | 2.58 | 0.69 | 0.89  |
| $K_{\text{B-B}}^{\text{coop}}$         | 52         | 982    | 189    | 127    | 86    | $\lambda_{\text{Dichaete}}$ | 0.91       | 2.33 | 1.98 | 4.54 | 3.49  |
| $D_{\text{B-H}}^C$                     | 165        | 161    | 158    | 150    | 150   | $\lambda_{\text{Hb}}$       | 1.93       | 1.5  | 1.83 | 4.99 | 4.25  |
| $D_{\text{C-H}}^C$                     | 57         | 58     | 70     | 22     | 28    | $\lambda_{\text{Kr}}$       | 3.08       | 2.31 | 4.04 | 0.98 | 4.99  |
| $D_{\text{B-B}}^{\text{coop}} \dagger$ | 60         | 20     | 60     | 60     | 60    | $\lambda_{\text{Kni}}$      | 1.6        | 1.17 | 2.48 | 1.56 | 1.82  |
| $E_{\text{Bcd}}^A$                     | 0.5        | 0.5    | 0.06   | 0.0001 | 0.001 | $\lambda_{\text{Gt}}$       | 1.25       | 1.47 | 1.71 | 4.99 | 4.63  |
| $E_{\text{Cad}}^A$                     | 0.0001     | 0.0001 | 0.0001 | 0.0001 | 0.39  | $\lambda_{\text{Tll}}$      | 0.87       | 1.26 | 4.98 | 0.96 | 4.99  |
| $E_{\text{D-STAT}}^A$                  | 19.9       | 19.9   | 0.0001 | 19.9   | 16.6  | $T_{\text{Bcd}} \dagger$    | 1.71       | 1.71 | 1.71 | 1.71 | 1.71  |
| $E_{\text{Dichaete}}^A$                | 0.0001     | 0.0001 | 0.0001 | 0.45   | 0.004 | $T_{\text{Cad}}$            | 2.53       | 2.22 | 3.06 | 2.06 | 3.0   |
| $E_{\text{Hb}}^A$                      | 14.4       | 13.5   | 20.41  | 29.9   | 19.1  | $T_{\text{D-STAT}}$         | 2.21       | 2.19 | 2.83 | 3.63 | 2.83  |
| $E_{\text{Hb}}^Q$                      | 0.99       | 0.99   | 0.99   | 0.99   | 0.99  | $T_{\text{Dichaete}}$       | 2.22       | 4.92 | 4.79 | 2.96 | 2.08  |
| $E_{\text{Kr}}^Q$                      | 0.99       | 0.99   | 0.9    | 0.99   | 0.51  | $T_{\text{Hb}} \dagger$     | 0.63       | 0.63 | 0.63 | 0.63 | 0.63  |
| $E_{\text{Kni}}^Q$                     | 0.54       | 0.75   | 0.06   | 0.99   | 0.26  | $T_{\text{Kr}}$             | 0.009      | 0.02 | 2.11 | 0.07 | 2.06  |
| $E_{\text{Gt}}^Q$                      | 0.75       | 0.43   | 0.72   | 0.74   | 0.99  | $T_{\text{Kni}}$            | 2.2        | 2.48 | 2.23 | 4.85 | 2.46  |
| $E_{\text{Tll}}^Q$                     | 0.99       | 0.14   | 0.99   | 0.99   | 0.81  | $T_{\text{Gt}}$             | 0.6        | 0.59 | 0.59 | 0.50 | 0.71  |
| $E_{\text{Hb}}^D$                      | 0.53       | 0.31   | 0.32   | 0.58   | 0.37  | $T_{\text{Tll}}$            | 1.83       | 1.82 | 1.97 | 1.97 | 1.97  |
| $E_{\text{Kr}}^D$                      | 0.99       | 0.73   | 0.99   | 0.99   | 0.6   |                             |            |      |      |      |       |
| $E_{\text{Kni}}^D$                     | 0.24       | 0.14   | 0.12   | 0.99   | 0.05  |                             |            |      |      |      |       |
| $E_{\text{Gt}}^D$                      | 0.87       | 0.99   | 0.17   | 0.99   | 0.51  |                             |            |      |      |      |       |
| $E_{\text{Tll}}^D$                     | 0.0001     | 0.0001 | 0.0002 | 0.0001 | 0.98  |                             |            |      |      |      |       |
| $D_{\text{all}}^Q \dagger$             | 100        | 100    | 100    | 100    | 100   |                             |            |      |      |      |       |
| $D_{\text{all}}^D \dagger$             | 100        | 100    | 100    | 100    | 100   |                             |            |      |      |      |       |

These parameters are inferred from the observed expression patterns by fitting transcription models to quantitative data. Daggers indicate parameters held fixed during the training process.  $S_{\text{construct}}^R$  is the positional effect scale factor for each reporter construct.  $R_{\text{max}}$  is the maximum rate of transcription.  $S_{\text{ligand}}^P$  is the scale factor for protein concentration. Other parameters are described in the main text.
