# Supplementary material for: Rearrangements of 2.5 Kilobases of Noncoding DNA from the Drosophila even-skipped Locus Define Predictive Rules of Genomic cis-Regulatory Logic
Source: PubMed Central journal article supplement (PMC3585115; doi:10.1371/journal.pgen.1003243), 2013-02-28
Supplement: pgen.1003243.s009.pdf [file pgen.1003243.s009.pdf]

Table S2. Alignment Matrices Used in the Model

|           |     |     |     |     |     |     |      |      |     |     |     |     |     |     |
|-----------|-----|-----|-----|-----|-----|-----|------|------|-----|-----|-----|-----|-----|-----|
| Bicoid    |     |     |     |     |     |     |      |      |     |     |     |     |     |     |
| A         | 83  | 74  | 108 | 48  | 6   | 381 | 379  | 5    | 0   | 6   | 72  | 61  | 65  | 68  |
| C         | 114 | 159 | 127 | 149 | 1   | 0   | 0    | 0    | 383 | 340 | 136 | 174 | 166 | 158 |
| G         | 106 | 72  | 114 | 11  | 0   | 2   | 4    | 4    | 0   | 3   | 132 | 60  | 52  | 49  |
| T         | 80  | 78  | 34  | 175 | 376 | 0   | 0    | 374  | 0   | 34  | 43  | 88  | 100 | 108 |
| Caudal    |     |     |     |     |     |     |      |      |     |     |     |     |     |     |
| A         | 9   | 12  | 3   | 4   | 12  | 38  | 0    | 4    | 22  | 1   |     |     |     |     |
| C         | 10  | 6   | 3   | 0   | 0   | 0   | 0    | 0    | 0   | 8   |     |     |     |     |
| G         | 4   | 4   | 3   | 0   | 2   | 0   | 0    | 7    | 15  | 10  |     |     |     |     |
| T         | 11  | 16  | 29  | 34  | 24  | 0   | 38   | 27   | 1   | 1   |     |     |     |     |
| D-STAT    |     |     |     |     |     |     |      |      |     |     |     |     |     |     |
| A         | 1   | 1   | 2   | 1   | 1   | 5   | 3    | 0    | 24  | 28  | 27  | 5   |     |     |
| C         | 0   | 0   | 1   | 27  | 20  | 16  | 3    | 2    | 3   | 0   | 1   | 8   |     |     |
| G         | 0   | 1   | 0   | 1   | 6   | 8   | 22   | 27   | 1   | 1   | 0   | 6   |     |     |
| T         | 29  | 28  | 27  | 1   | 3   | 1   | 2    | 1    | 2   | 1   | 2   | 1   |     |     |
| Dichaete  |     |     |     |     |     |     |      |      |     |     |     |     |     |     |
| A         | 1   | 0   | 0   | 20  | 0   | 0   | 2    | 0    | 1   | 4   | 6   |     |     |     |
| C         | 8   | 25  | 17  | 0   | 0   | 0   | 0    | 0    | 2   | 10  | 1   |     |     |     |
| G         | 7   | 0   | 0   | 0   | 0   | 3   | 27   | 0    | 4   | 6   | 1   |     |     |     |
| T         | 13  | 4   | 12  | 9   | 29  | 26  | 0    | 29   | 22  | 9   | 21  |     |     |     |
| Hunchback |     |     |     |     |     |     |      |      |     |     |     |     |     |     |
| A         | 53  | 2   | 0   | 2   | 0   | 0   | 0    | 281  | 31  | 20  |     |     |     |     |
| C         | 6   | 6   | 2   | 0   | 2   | 3   | 2    | 0    | 43  | 100 |     |     |     |     |
| G         | 224 | 3   | 0   | 0   | 0   | 0   | 0    | 3    | 78  | 109 |     |     |     |     |
| T         | 7   | 279 | 288 | 288 | 288 | 287 | 288  | 6    | 138 | 61  |     |     |     |     |
| Kruppel   |     |     |     |     |     |     |      |      |     |     |     |     |     |     |
| A         | 17  | 187 | 158 | 0   | 1   | 0   | 8    | 0    | 2   | 44  |     |     |     |     |
| C         | 73  | 5   | 39  | 194 | 194 | 197 | 22   | 2    | 34  | 109 |     |     |     |     |
| G         | 6   | 0   | 0   | 1   | 0   | 0   | 6    | 0    | 2   | 15  |     |     |     |     |
| T         | 101 | 5   | 0   | 2   | 2   | 0   | 161  | 195  | 159 | 29  |     |     |     |     |
| Knirps    |     |     |     |     |     |     |      |      |     |     |     |     |     |     |
| A         | 19  | 25  | 16  | 5   | 0   | 21  | 0    | 17   | 1   | 0   | 25  | 5   |     |     |
| C         | 1   | 1   | 0   | 9   | 4   | 0   | 0    | 0    | 3   | 26  | 0   | 12  |     |     |
| G         | 2   | 0   | 0   | 6   | 1   | 5   | 26   | 8    | 18  | 0   | 1   | 7   |     |     |
| T         | 4   | 0   | 10  | 6   | 21  | 0   | 0    | 1    | 4   | 0   | 0   | 2   |     |     |
| Giant     |     |     |     |     |     |     |      |      |     |     |     |     |     |     |
| A         | 86  | 12  | 776 | 8   | 83  | 0   | 1020 | 1106 | 15  |     |     |     |     |     |
| C         | 62  | 108 | 25  | 762 | 19  | 556 | 88   | 0    | 378 |     |     |     |     |     |
| G         | 19  | 359 | 275 | 65  | 996 | 0   | 1    | 0    | 85  |     |     |     |     |     |
| T         | 942 | 630 | 33  | 274 | 11  | 553 | 0    | 3    | 631 |     |     |     |     |     |
| Tailless  |     |     |     |     |     |     |      |      |     |     |     |     |     |     |
| A         | 12  | 1   | 1   | 5   | 2   | 11  | 1    | 0    | 0   |     |     |     |     |     |
| C         | 8   | 2   | 2   | 1   | 3   | 1   | 17   | 2    | 3   |     |     |     |     |     |
| G         | 0   | 2   | 1   | 0   | 15  | 5   | 0    | 1    | 2   |     |     |     |     |     |
| T         | 0   | 15  | 16  | 14  | 0   | 3   | 2    | 17   | 15  |     |     |     |     |     |

For each PWM, the left most column indicates DNA bases. The remaining columns show the number of observed bases at each position in the binding site.
