# Supplementary material for: Rearrangements of 2.5 Kilobases of Noncoding DNA from the Drosophila even-skipped Locus Define Predictive Rules of Genomic cis-Regulatory Logic
Source: PubMed Central journal article supplement (PMC3585115; doi:10.1371/journal.pgen.1003243), 2013-02-28
Supplement: pgen.1003243.s010.pdf [file pgen.1003243.s010.pdf]

Table S3. Comparison Between PWMs

|                 | This work    | Berman <i>et al.</i> [1] | Segal <i>et al.</i> [2] |
|-----------------|--------------|--------------------------|-------------------------|
| <b>Bcd</b>      | 79% (38/48)  | 100% (48/48)             | 58% (28/48)             |
|                 | 8% (3/35)    | 42% (15/35)              | 14% (5/35)              |
| <b>Cad</b>      | 76% (10/13)  | 100% (13/13)             | 69% (9/13)              |
|                 | 15% (4/26)   | 100% (26/26)             | 19% (5/26)              |
| <b>D-STAT</b>   | 100% (3/3)   | N/A                      | 0% (0/3)                |
|                 | 17% (3/17)   | N/A                      | 17%(3/17)               |
| <b>Dichaete</b> | 100% (4/4)   | N/A                      | N/A                     |
|                 | 22% (4/18)   | N/A                      | N/A                     |
| <b>Hb</b>       | 87% (90/103) | 98% (101/103)            | 86% (89/103)            |
|                 | 3% (1/26)    | 19% (5/26)               | 0% (0/26)               |
| <b>Kr</b>       | 75% (34/45)  | 86% (39/45)              | 86% (39/45)             |
|                 | 6% (1/15)    | 26% (4/15)               | 40% (6/15)              |
| <b>Kni</b>      | 75% (25/33)  | 84% (28/33)              | 42% (14/33)             |
|                 | 21% (9/42)   | 59% (25/42)              | 28% (12/42)             |
| <b>Gt</b>       | 75% (6/8)    | N/A                      | 62% (5/8)               |
|                 | 6% (1/15)    | N/A                      | 20% (3/15)              |
| <b>Tll</b>      | 94% (35/37)  | N/A                      | 70% (26/37)             |
|                 | 63% (23/26)  | N/A                      | 52% (19/36)             |

For each TF, the top row is the recovery rate of footprint sites and the bottom row is the rate of false positives.

## References

1. Berman BP, Nibu Y, Pfeiffer BD, Tomancak P, Celniker SE, et al. (2002) Exploiting transcription factor binding site clustering to identify cis-regulatory modules involved in pattern formation in the *Drosophila* genome. *Proceedings of the National Academy of Sciences USA* 99: 757-762.
2. Segal E, Raveh-Sadka T, Schroeder M, Unnerstall U, Gaul U (2008) Predicting expression patterns from regulatory sequence in *Drosophila* segmentation. *Nature* 451: 535-540.
