# Supplementary material for: Rearrangements of 2.5 Kilobases of Noncoding DNA from the Drosophila even-skipped Locus Define Predictive Rules of Genomic cis-Regulatory Logic
Source: PubMed Central journal article supplement (PMC3585115; doi:10.1371/journal.pgen.1003243), 2013-02-28
Supplement: pgen.1003243.s011.pdf [file pgen.1003243.s011.pdf]

Table S4. Regulatory Sequences Used for Predictions

| Index | Name           | Length (bp) | DNA source | Reference | Genomic position (bp)    |
|-------|----------------|-------------|------------|-----------|--------------------------|
| 4B1   | eve_MSE2Mbcd1  | 489         | [1]        | [1]       |                          |
| 4B2   | eve_MSE2Mbcd3  | 489         | [1]        | [1]       |                          |
| 4B3   | eve_MSE3M2dsts | 502         | [2]        | [2]       |                          |
| 4B4   | eve_M32_MKr345 | 1016        | [3]        | [3]       |                          |
| 4B5   | eve_M32_Mbcd1  | 1016        | [3]        | [3]       |                          |
| 4C1   | S2E(yak)*      | 844         | [4]        | [4]       | C2L:18492244,18493087    |
| 4C2   | S2E(pse)*      | 1027        | [4]        | [4]       | C3:10905710,10906728     |
| 4C3   | S2E(ere)*      | 849         | [4]        | [4]       | S4929:8503125,8503973    |
| 4C4   | S2E(ore)       | 905         | Text S2    | This work |                          |
| 4C5   | S2E(tei)       | 882         | Text S2    | This work |                          |
| 4C6   | S2E(tak)       | 742         | Text S2    | This work |                          |
| 4C7   | S2E(mau)       | 797         | Text S2    | This work |                          |
| 4C8   | S2E(sec)*      | 788         | Text S2    | This work | S359:11527,12271         |
| 4C9   | S2E(per)       | 753         | Text S2    | This work | S4:6229414,6230166       |
| 4C10  | S2E(sim)*      | 798         | [4]        | [4]       | C2R:4497397,4498185      |
| 4C11  | S2E(ana)*      | 816         | Text S2    | This work | S13266:15364458,15365264 |
| 4C12  | S2E(vir)*      | 973         | Text S2    | This work | S12875:1336908,1337886   |
| 4C13  | S2E(pic)       | 1036        | [5]        | [5]       |                          |
| 4C14  | S2E(gri)       | 1065        | Text S2    | This work | S15245:9655365,9656429   |
| 4C15  | S2E(moj)       | 1089        | Text S2    | This work | S6496:4429248,4430336    |
| 4C16  | S2E(wil)       | 1100        | Text S2    | This work | S180700:33743,34842      |
| 4D1   | MSE5           | 804         | Redfly     | [6]       | C2R:5498538,5499341      |
| 4D2   | MSE4.6         | 800         | Redfly     | [6]       | C2R:5495712,5496511      |
| 4D3   | M3_S2(p1-m2)   | 1544        | [7]        | [7]       |                          |
| 4D4   | M3_S2(m1-p2)   | 1433        | [7]        | [7]       |                          |
| 4E1   | S2E(cyn)       | 1939        | [8]        | [8]       |                          |
| 4E2   | S2E(put)       | 1698        | [8]        | [8]       |                          |
| 4E3   | S2E(sup)       | 1791        | [8]        | [8]       |                          |
| 4E4   | S2E(dsp)       | 2437        | [8]        | [8]       |                          |
| 4E5   | S2E(min)       | 1579        | [8]        | [8]       |                          |
| 4E6   | S2E(pun)       | 2034        | [8]        | [8]       |                          |
| 4E7   | S37E(cyn)      | 2044        | [8]        | [8]       |                          |
| 4E8   | S37E(put)      | 1682        | [8]        | [8]       |                          |
| 4E9   | S37E(sup)      | 1887        | [8]        | [8]       |                          |
| 4E10  | S37E(dsp)      | 1540        | [8]        | [8]       |                          |
| 4E11  | S37E(min)      | 1575        | [8]        | [8]       |                          |
| 4E12  | S37E(pun)      | 2120        | [8]        | [8]       |                          |
| 4F1   | hb_pThb1_hbp   | 298         | Redfly     | [9]       | C3R:4520323,4520620      |
| 4F2   | Kr_CD1_hsp70p  | 1159        | Redfly     | [10]      | C2R:20730219,20731377    |
| 4F3   | run_str1_7     | 1611        | Redfly     | [11]      | CX:20490688,20492298     |
| 4F4   | run_str3_7     | 2404        | Redfly     | [11]      | CX:20493864,20496267     |
| 4F5   | h_str3.4       | 1745        | Redfly     | [12]      | C3L:8637477,8639221      |
| 4G1   | eve_ups        | 3942        | FlyBase    | [13]      | C2R:5487187,5491128      |
| 4G2   | eve_downs      | 3500        | FlyBase    | [6]       | C2R:5496129, 5499628     |

| Index | Name            | Length (bp) | DNA source | Reference | Genomic position (bp) |
|-------|-----------------|-------------|------------|-----------|-----------------------|
| S5C   | hbHZ1400_hsp70p | 1421        | Redfly     | [9]       | C3R:4526522,4527942   |
| S5D   | kni_+1          | 1479        | Redfly     | [14]      | C3L:20533736,20629274 |
| S5E   | kni_kd          | 875         | Redfly     | [15]      | C3L:20630383,20631257 |
| S5F   | gt_(-1)         | 1239        | Redfly     | [14]      | CX:2285171,2286409    |
| S5G   | gt_(-3)         | 1209        | Redfly     | [14]      | CX:2286417,2287625    |
| S5H   | run_5           | 1340        | Redfly     | [11]      | CX:20492298,20493637  |
| S5I   | h_str1          | 876         | Redfly     | [16]      | C3L:8644872,8645747   |
| S5J   | h_str2_6        | 1081        | Redfly     | [12]      | C3L:8640258,8641338   |
| S5K   | h_str5          | 564         | Redfly     | [17]      | C3L:8644027,8644590   |
| S5L   | h_str6          | 547         | Redfly     | [18]      | C3L:8640797,8641343   |

All DNA sequences used in this work are listed here. Index indicates the figure panel where the results of the prediction are shown. Name indicates the sequence designator used in that panel. DNA source gives the source of the sequence itself, and Reference where it was first described. We give the genomic position if known. Asterisks in the second column indicate that there were small differences between the regulatory sequences we utilized and the corresponding sequences available in FlyBase (<http://www.flybase.org>). The REDfly database is at <http://redfly.ccr.buffalo.edu>. Full sequences first identified in this work are listed in Text S2.

## References

1. Small S, Blair A, Levine M (1992) Regulation of *even-skipped* stripe 2 in the *Drosophila* embryo. The EMBO Journal 11: 4047-4057.
2. Yan R, Small S, Desplan C, Dearolf CR, Jr JED (1996) Identification of a *stat* gene that functions in *Drosophila* development. Cell 84: 421-430.
3. Small S, Arnosti DN, Levine M (1993) Spacing ensures autonomous expression of different stripe enhancers in the *even-skipped* promoter. Development 119: 767-772.
4. Ludwig MZ, Kreitman M (1995) Evolutionary dynamics of the enhancer region of *even-skipped* in *Drosophila*. Molecular Biology and Evolution 12: 1002-1011.
5. Sackerson C (1995) Patterns of conservation and divergence at the *even-skipped* locus of *Drosophila*. Mechanisms of Development 51: 199-215.
6. Fujioka M, Emi-Sarker Y, Yusibova GL, Goto T, Jaynes JB (1999) Analysis of an *even-skipped* rescue transgene reveals both composite and discrete neuronal and early blastoderm enhancers, and multi-stripe positioning by gap gene repressor gradients. Development 126: 2527-2538.
7. Ludwig MZ, Bergman CM, Patel NH, Kreitman M (2000) Evidence for stabilizing selection in a eukaryotic enhancer element. Nature 403: 564-567.
8. Hare EE, Peterson BK, Iyer VN, Meier R, Eisen MB (2008) Sepsid *even-skipped* enhancers are functionally conserved in *Drosophila* despite lack of sequence conservation. PLoS Genetics 4: e1000106.
9. Margolis JS, Borowsky ML, Steingrimsson E, Shim CW, Lengyel JA, et al. (1995) Posterior stripe expression of *hunchback* is driven from two promoters by a common enhancer element. Development 121: 3067-3077.
10. Hoch M, Schröder C, Seifert E, Jäckle H (1990) *Cis*-acting control elements for *Krüppel* expression in the *Drosophila* embryo. The EMBO Journal 9: 2587-2595.

11. Klingler M, Soong J, Butler B, Gergen JP (1996) Disperse versus compact elements for the regulation of *runt* stripes in *Drosophila*. *Developmental Biology* 177: 73-84.
12. Howard KR, Struhl G (1990) Decoding positional information: regulation of the pair-rule gene *hairy*. *Development* 110: 1223-1231.
13. Stanojevic D, Small S, Levine M (1991) Regulation of a segmentation stripe by overlapping activators and repressors in the *Drosophila* embryo. *Science* 254: 1385-1387.
14. Schroeder MD, Pearce M, Fak J, Fan HQ, Unnerstall U, et al. (2004) Transcriptional control in the segmentation gene network of *Drosophila*. *PLoS Biology* 2: e271.
15. Pankratz MJ, Busch M, Hoch M, Seifert E, Jäckle H (1992) Spatial control of the gap gene *knirps* in the *Drosophila* embryo by posterior morphogen system. *Science* 255: 986-989.
16. Riddihough G, Ish-Horowicz D (1991) Individual stripe regulatory elements in the *Drosophila hairy* promoter respond to maternal, gap, and pair-rule genes. *Genes and Development* 5: 840-854.
17. Langeland JA, Carroll SB (1993) Conservation of regulatory elements controlling *hairy* pair-rule stripe formation. *Development* 117: 585-596.
18. Häder T, Rosée AL, Ziebold U, Busch M, Taubert H, et al. (1998) Activation of posterior pair-rule stripe expression in response to maternal *caudal* and zygotic *knirps* activities. *Mechanisms of Development* 71: 177-186.
