# Supplementary material for: Rearrangements of 2.5 Kilobases of Noncoding DNA from the Drosophila even-skipped Locus Define Predictive Rules of Genomic cis-Regulatory Logic
Source: PubMed Central journal article supplement (PMC3585115; doi:10.1371/journal.pgen.1003243), 2013-02-28
Supplement: pgen.1003243.s012.pdf [file pgen.1003243.s012.pdf]

Table S5. *Drosophila* and Sepsid Species Abbreviations

| Abbreviation | Species                         | Figure index |
|--------------|---------------------------------|--------------|
| yak          | <i>Drosophila yakuba</i>        | (4C1)        |
| pse          | <i>Drosophila pseudoobscura</i> | (4C2)        |
| ere          | <i>Drosophila erecta</i>        | (4C3)        |
| ore          | <i>Drosophila orena</i>         | (4C4)        |
| tei          | <i>Drosophila teissieri</i>     | (4C5)        |
| tak          | <i>Drosophila takahashi</i>     | (4C6)        |
| mau          | <i>Drosophila mauritiana</i>    | (4C7)        |
| sec          | <i>Drosophila sechellia</i>     | (4C8)        |
| per          | <i>Drosophila persimilis</i>    | (4C9)        |
| sim          | <i>Drosophila simulans</i>      | (4C10)       |
| ana          | <i>Drosophila ananassae</i>     | (4C11)       |
| vir          | <i>Drosophila virilis</i>       | (4C12)       |
| pic          | <i>Drosophila picticornis</i>   | (4C13)       |
| gri          | <i>Drosophila grimshawi</i>     | (4C14)       |
| moj          | <i>Drosophila mojavensis</i>    | (4C15)       |
| wil          | <i>Drosophila willistoni</i>    | (4C16)       |
| cyn          | <i>Sepsis cynipsea</i>          | (4E1,7)      |
| put          | <i>Themira putris</i>           | (4E2,8)      |
| sup          | <i>Themira superba</i>          | (4E3,9)      |
| dsp          | <i>Dicranosepsis sp.</i>        | (4E4,10)     |
| min          | <i>Themira minor</i>            | (4E5,11)     |
| pun          | <i>Sepsis punctum</i>           | (4E6,12)     |

For each full species name, the first word indicates the genus and the second word indicates species.
